# Supplementary material for: Double-Layered Polymer Microcapsule Containing Non-Flammable Agent for Initial Fire Suppression
Source: MDPI journal article supplement (doi:10.3390/ma15217831), 2022-11-06
Supplement: s1 [file s1]

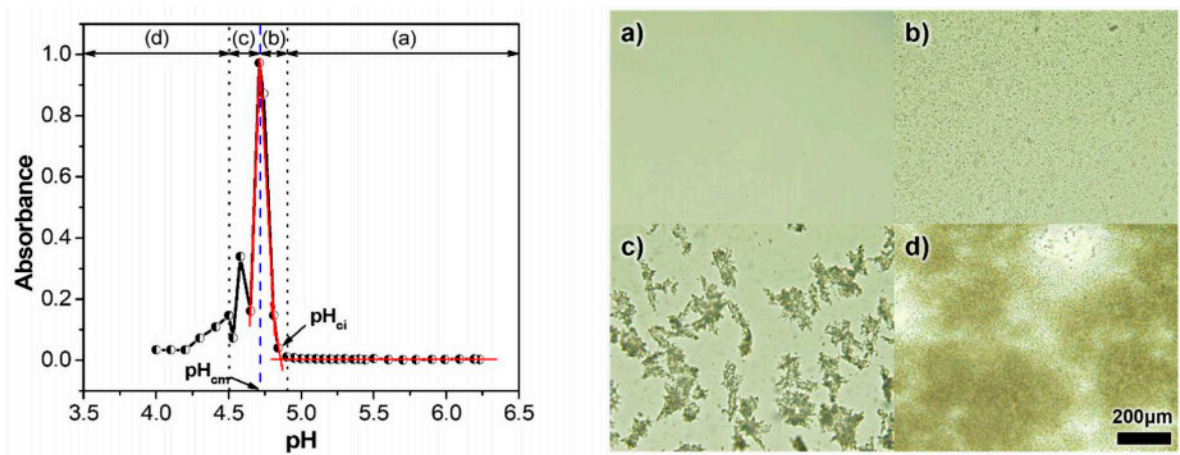

**Figure S1.** Turbidimetric analysis for optimization of microencapsulation; a–d).optical images according to pH value in the turbidimetric analysis graph.

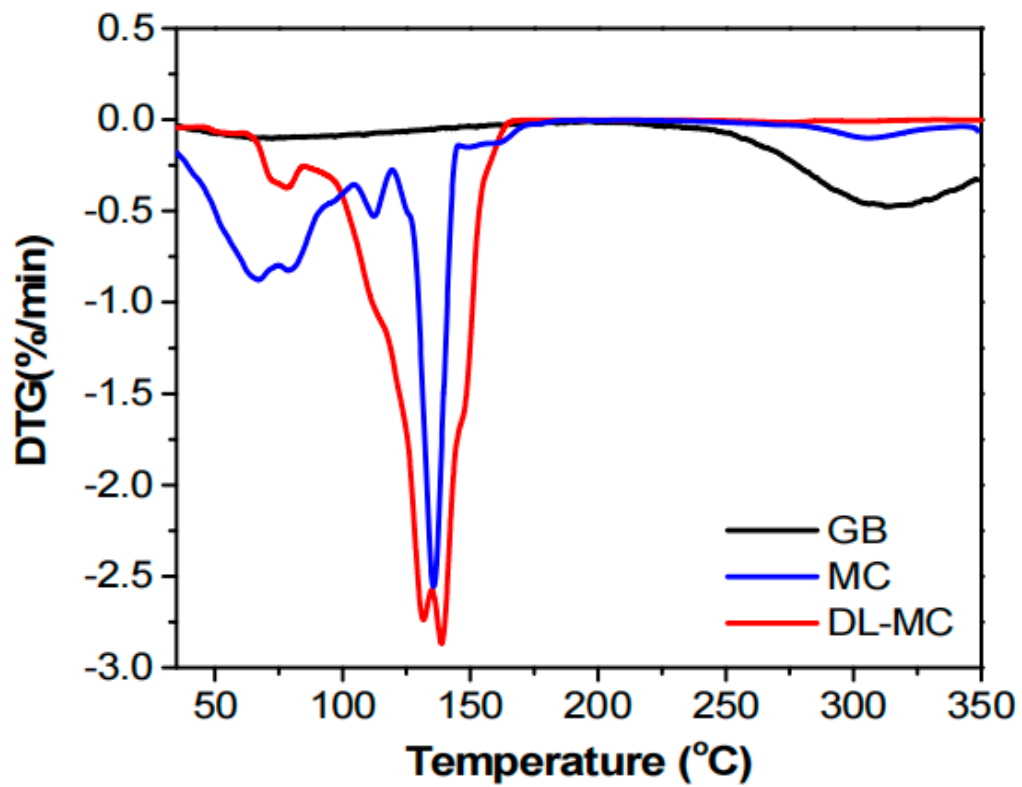

**Figure S2.** DTG data of GB, MC and DL-MC.

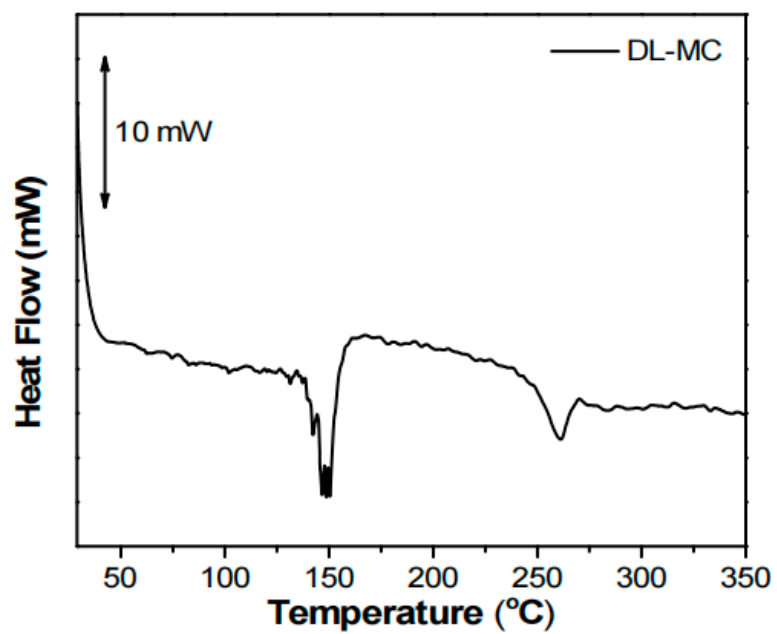

**Figure S3.** Different scanning calorimeter (DSC) of DL-MC.
